# Supplementary material for: Orthogonality in Principal Component Analysis Allows the Discovery of Lipids in the Jejunum That Are Independent of Ad Libitum Feeding
Source: MDPI journal article supplement (doi:10.3390/metabo12090866), 2022-09-14
Supplement: s1 [file s1]

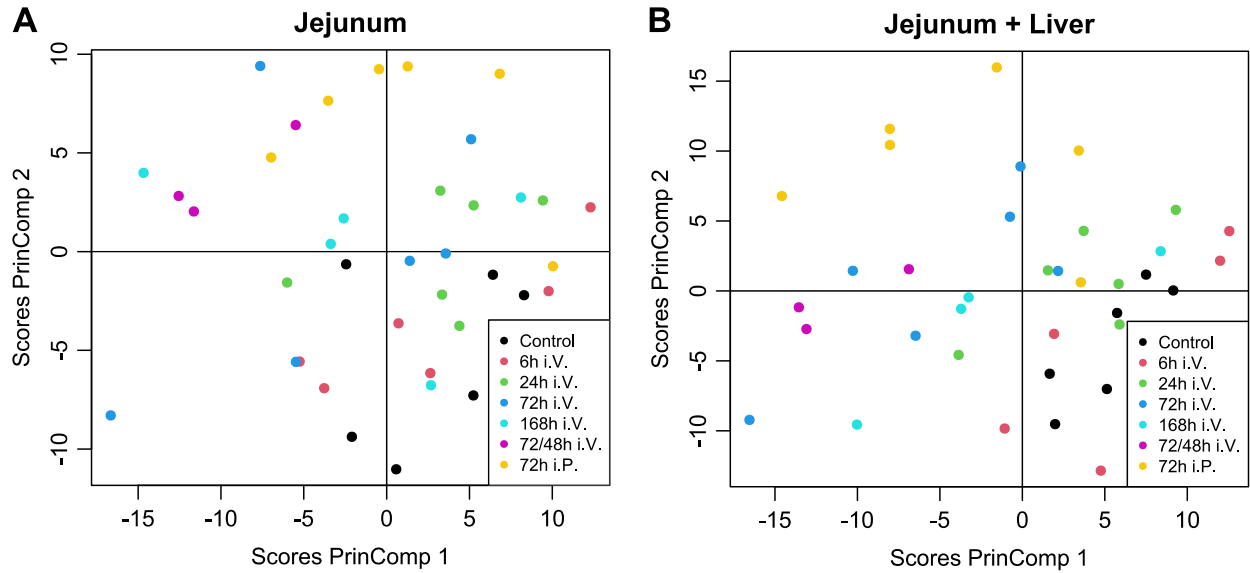

**Figure S1.** Scatterplot of the scores of the principal component analyses in Figure 2. **A)** Scores of the first two principal components of the lipids identified in the jejunum (the loadings are in Figure 2A). Principal Component 1 represents 32% of the variance and Principal Component 2 represents 19% of the variation. **B)** Scores of the first two principal component analysis of the lipids identified in the jejunum and the liver (the loadings are in Figure 2B). Principal Component 1 represents 21% of the variance and Principal Component 2 represents 15% of the variation. i.V., intra venous treatment; i.P., intra peritoneal treatment.
