# Supplementary material for: Orthogonality in Principal Component Analysis Allows the Discovery of Lipids in the Jejunum That Are Independent of Ad Libitum Feeding
Source: Metabolites. 2022 Sep 14;12(9):866. doi: 10.3390/metabo12090866 (PMC9506031; doi:10.3390/metabo12090866)
Supplement: Supplementary file 1 [file metabolites-12-00866-s001.zip › Supplementary Material_1.xlsx]

## Sheet: Variables
Sample.ID	Tissue	family	lipid	Carbons	Unsaturations	RT/s	Adduct	mz	ppm m/z adduct	MS/MS: m/z and fragment identification
Var_001	Liver	FA	FA(16:0)	16	0	248.01	[M-H]-	255.231	-5.3
Var_002	Liver	FA	FA(16:1)	16	1	189.16	[M-H]-	253.215	-7
Var_003	Liver	FA	FA(17:0)	17	0	291.59	[M-H]-	269.246	-6.6
Var_004	Liver	FA	FA(18:0)	18	0	337.64	[M-H]-	283.263	-3.7
Var_005	Liver	FA	FA(18:1)	18	1	263.97	[M-H]-	281.247	-4.3
Var_006	Liver	FA	FA(18:2)	18	2	209.26	[M-H]-	279.231	-4.2
Var_007	Liver	FA	FA(20:0)	20	0	429.02	[M-H]-	311.294	-4.2
Var_008	Liver	FA	FA(20:2)	20	2	281.2	[M-H]-	307.262	-4.6
Var_009	Liver	FA	FA(20:2)	20	2	294.62	[M-H]-	307.262	-4.6
Var_010	Liver	FA	FA(20:3)	20	3	235.24	[M-H]-	305.247	-4.6
Var_011	Liver	FA	FA(20:3)	20	3	251.17	[M-H]-	305.247	-4.6
Var_012	Liver	FA	FA(20:4)	20	4	202.37	[M-H]-	303.231	-3.1
Var_013	Liver	FA	FA(20:5)	20	5	165.5	[M-H]-	301.215	-4.7
Var_014	Liver	FA	FA(22:4)	22	4	260.86	[M-H]-	331.263	-2.2
Var_015	Liver	FA	FA(22:6)	22	6	188.39	[M-H]-	327.231	-3.3
Var_016	Liver	CholLipid	Cholesterol			572.04	[cholesterol.fragment]+	369.352	-2.2
Var_017	Liver	CholLipid	CE			819.02	[cholesterol.fragment]+	369.351	-2.2
Var_018	Liver	CholLipid	CE			839.68	[cholesterol.fragment]+	369.351	-2.2
Var_019	Liver	CholLipid	CE			859.78	[cholesterol.fragment]+	369.351	-2.2
Var_020	Liver	CholLipid	CE			890.27	[cholesterol.fragment]+	369.351	-2.2
Var_021	Liver	CholLipid	CE			895.8	[cholesterol.fragment]+	369.351	-2.2
Var_022	Liver	TG	TG(46:0)	46	0	855.56	[M+Na]+	801.692	-2.9
							[M+NH4]+	796.738	-1.9
Var_023	Liver	TG	TG(46:1)	46	1	825.49	[M+Na]+	799.676	-3.6
							[M+NH4]+	794.722	-2.4
Var_024	Liver	TG	TG(46:1)	46	1	830.11	[M+Na]+	799.676	-3.6
							[M+NH4]+	794.722	-2.4
Var_025	Liver	TG	TG(48:0)	48	0	880.08	[M+Na]+	829.724	-2.6
							[M+NH4]+	824.769	-1.6
Var_026	Liver	TG	TG(48:1)	48	1	851.15	[M+Na]+	827.709	-2.3
							[M+NH4]+	822.754	-1.3
Var_027	Liver	TG	TG(48:2)	48	2	823.73	[M+Na]+	825.693	-2.4
							[M+NH4]+	820.738	-1.5
Var_028	Liver	TG	TG(50:1)	50	1	875.25	[M+Na]+	855.74	-1.8
							[M+NH4]+	850.785	-1.2
Var_029	Liver	TG	TG(50:2)	50	2	849.56	[M+Na]+	853.725	-1.4
							[M+NH4]+	848.77	-1.1
Var_030	Liver	TG	TG(50:4)	50	4	795.26	[M+Na]+	849.692	-3.4
							[M+NH4]+	844.737	-2.9
Var_031	Liver	TG	TG(51:2)	51	2	859.68	[M+Na]+	867.74	-2.6
							[M+NH4]+	862.784	-2.1
Var_032	Liver	TG	TG(51:3)	51	3	833.92	[M+Na]+	865.724	-2.8
							[M+NH4]+	860.769	-2.4
Var_033	Liver	TG	TG(52:3)	52	3	846.31	[M+Na]+	879.741	-1
							[M+NH4]+	874.786	-0.5
Var_034	Liver	TG	TG(52:4)	52	4	821.09	[M+Na]+	877.725	-1.2
							[M+NH4]+	872.77	-1.3
Var_035	Liver	TG	TG(54:3)	54	3	868.37	[M+Na]+	907.772	-1.3
							[M+NH4]+	902.816	-1.5
Var_036	Liver	TG	TG(54:4)	54	4	842.82	[M+Na]+	905.756	-2
							[M+NH4]+	900.8	-2.2
Var_037	Liver	TG	TG(54:7)	54	7	769.49	[M+Na]+	899.708	-3
							[M+NH4]+	894.752	-3.1
Var_038	Liver	TG	TG(56:3)	56	3	889.74	[M+Na]+	935.807	3.1
							[M+NH4]+	930.847	-2.6
Var_039	Liver	TG	TG(56:6)	56	6	825.83	[M+Na]+	929.756	-1.8
							[M+NH4]+	924.8	-1.8
Var_040	Liver	TG	TG(56:6)	56	6	831.68	[M+Na]+	929.756	-1.8
							[M+NH4]+	924.8	-1.8
Var_041	Liver	TG	TG(56:6)	56	6	840.02	[M+Na]+	929.756	-1.8
							[M+NH4]+	924.8	-1.8
Var_042	Liver	TG	TG(56:7)	56	7	805.11	[M+Na]+	927.74	-1.4
							[M+NH4]+	922.785	-1.6
Var_043	Liver	TG	TG(56:7)	56	7	815.78	[M+Na]+	927.74	-1.4
							[M+NH4]+	922.785	-1.6
Var_044	Liver	TG	TG(56:7)	56	7	819.01	[M+Na]+	927.74	-1.4
							[M+NH4]+	922.785	-1.6
Var_045	Liver	TG	TG(58:6)	58	6	848.68	[M+Na]+	957.785	-3.8
							[M+NH4]+	952.831	-2.4
Var_046	Liver	LPC	LPC(16:0)	16	0	248.84	[M+H]+	496.341	0.7
							[M+HCO2]-	540.33	-0.1
Var_047	Liver	LPC	LPC(16:0)	16	0	263.15	[M+H]+	496.341	0.7
							[M+HCO2]-	540.33	-0.1
Var_048	Liver	LPC	LPC(18:0)	18	0	318.85	[M+H]+	524.372	0.7
							[M+HCO2]-	568.362	0.4
Var_049	Liver	LPC	LPC(18:0)	18	0	333.18	[M+H]+	524.372	0.7
							[M+HCO2]-	568.362	0.4
Var_050	Liver	LPC	LPC(18:1)	18	1	259.7	[M+H]+	522.355	-1.5
							[M+HCO2]-	566.345	-0.8
Var_051	Liver	LPC	LPC(18:1)	18	1	271.96	[M+H]+	522.355	-1.5
							[M+HCO2]-	566.345	-0.8
Var_052	Liver	LPC	LPC(18:2)	18	2	213.6	[M+H]+	520.34	-1.2
							[M+HCO2]-	564.33	-0.9
Var_053	Liver	LPC	LPC(18:2)	18	2	226.08	[M+H]+	520.34	-1.2
							[M+HCO2]-	564.33	-0.9
Var_054	Liver	LPC	LPC(20:4)	20	4	208.59	[M+H]+	544.34	-0.6
							[M+HCO2]-	588.33	-0.9
Var_055	Liver	LPC	LPC(20:4)	20	4	216.13	[M+H]+	544.34	-0.6
							[M+HCO2]-	588.33	-0.9
Var_056	Liver	LPC	LPC(22:6)	22	6	199.52	[M+H]+	568.34	-1.5
							[M+HCO2]-	612.33	-1.1
Var_057	Liver	LPC	LPC(22:6)	22	6	209.68	[M+H]+	568.34	-1.5
							[M+HCO2]-	612.33	-1.1
Var_058	Liver	LPE	LPE(16:0)	16	0	268.17	[M+H]+	454.292	-2.2
							[M-H]-	452.277	-1.1
Var_059	Liver	LPE	LPE(18:0)	18	0	338.79	[M+H]+	482.324	-2.1
							[M-H]-	480.309	-0.2
Var_060	Liver	LPE	LPE(20:4)	20	4	212.93	[M-H]-	500.277	-0.7
							[M+H]+	502.293	-0.9
Var_061	Liver	LPE	LPE(20:4)	20	4	219.99	[M-H]-	500.277	-0.7
							[M+H]+	502.293	-0.9
Var_062	Liver	PC	PC(16:0/16:0)	32	0	623.71	[M+H]+	734.57	0
							[M+HCO2]-	778.561	0.9	718.5394 [M-CH3]-; 255.2316 [FA(16:0)]-
Var_063	Liver	PC	PC(16:0/16:1)>PC(14:0/18:1)	32	1	580.62	[M+H]+	732.554	0.2
							[M+HCO2]-	776.544	-0.7	716.5231 [M-CH3]-; 253.2156 [FA(16:1)]-; 255.2309 [FA(16:0)]-; 281.2471 [FA(18:1)]-; 227.1983 [FA(14:0)]-
Var_064	Liver	PC	PC(16:1/16:1)	32	2	535.07	[M+H]+	730.538	-1.4
							[M+HCO2]-	774.528	-0.4	714.5080 [M-CH3]-; 253.2153 [FA(16:1)]-
Var_065	Liver	PC	PC(14:0/18:2)	32	2	540.62	[M+H]+	730.538	-1.4
							[M+HCO2]-	774.528	-0.4	714.5096 [M-CH3]-; 279.2319 [FA(18:2)]-; 227.1993 [FA(14:0)]-
Var_066	Liver	PC	PC(33:5)	33	5	593.65	[M+H]+	738.504	-4.4
							[M+HCO2]-	782.495	-2.8
Var_067	Liver	PC	PC(16:0/18:1)	34	1	622.8	[M+H]+	760.587	2.1
							[M+HCO2]-	804.576	1.1	744.5549 [M-CH3]-; 281.2472 [FA(18:1)]-; 255.2309 [FA(16:0)]-
Var_068	Liver	PC	PC(16:0/18:2)	34	2	586.94	[M+H]+	758.577	8.6
							[M+HCO2]-	802.561	1.1	742.5392 [M-CH3]-; 279.2315 [FA(18:2)]-; 255.2311 [FA(16:0)]-
Var_069	Liver	PC	PC(14:0/20:4)	34	4	529.63	[M+H]+	754.538	-1.5
							[M+HCO2]-	798.528	-0.5	738.5072 [M-CH3]-; 303.2311 [FA(20:4)]-; 227.1988 [FA(14:0)]-
Var_070	Liver	PC	PC(35:2)	35	2	600.98	[M+H]+	772.585	-0.7
							[M+HCO2]-	816.573	-2.4
Var_071	Liver	PC	PC(35:2)	35	2	607.95	[M+H]+	772.585	-0.7
							[M+HCO2]-	816.573	-2.4
Var_072	Liver	PC	PC(35:4)	35	4	553.32	[M+H]+	768.553	-1.7
							[M+HCO2]-	812.544	-0.6
Var_073	Liver	PC	PC(18:0/18:1)	36	1	662.47	[M+H]+	788.616	-0.6
							[M+HCO2]-	832.607	0.6	772.5858 [M-CH3]-; 281.2466 [FA(18:1)]-; 283.2624 [FA(18:0)]-
Var_074	Liver	PC	PC(18:0/18:2)	36	2	628.8	[M+H]+	786.604	4
							[M+HCO2]-	830.592	1.3	770.5706 [M-CH3]-; 279.2317 [FA(18:2)]-; 283.2628 [FA(18:0)]-
Var_075	Liver	PC	PC(16:1/20:4)	36	5	531.95	[M+H]+	780.553	-1.3
							[M+HCO2]-	824.544	-0.3	764.5223 [M-CH3]-; 303.2305 [FA(20:4)]-; 253.2151 [FA(16:1)]-
Var_076	Liver	PC	PC(16:0/20:5)	36	5	543.72	[M+H]+	780.553	-1.3
							[M+HCO2]-	824.544	-0.3	764.5229 [M-CH3]-; 301.2148 [FA(20:5)]-; 255.2309 [FA(16:0)]-
Var_077	Liver	PC	PC(37:4)	37	4	596.63	[M+H]+	796.586	0.3
							[M+HCO2]-	840.576	0.7
Var_078	Liver	PC	PC(37:7)	37	7	623.31	[M+H]+	790.536	-3.6
							[M+HCO2]-	834.527	-2.4
Var_079	Liver	PC	PC(18:0/20:4)	38	4	616.85	[M+H]+	810.609	9.2
							[M+HCO2]-	854.592	1.2	766.5377 [M-CH3]-; 303.2309 [FA(20:4)]-; 283.2619 [FA(18:0)]-
Var_080	Liver	PC	PC(18:1/20:4)	38	5	573.27	[M+H]+	808.586	-0.1
							[M+HCO2]-	852.576	0.3	792.5543 [M-CH3]-; 303.2318 [FA(20:4)]-; 281.2472 [FA(18:1)]-
Var_081	Liver	PC	PC(16:0/22:6)	38	6	559.33	[M+H]+	806.571	1.1
							[M+HCO2]-	850.56	0.5	790.5387 [M-CH3]-; 327.2314 [FA(22:6)]-; 255.2309 [FA(16:0)]-
Var_082	Liver	PC	PC(39:5)	39	5	594.39	[M+H]+	822.598	-4.5
							[M+HCO2]-	866.591	0
Var_083	Liver	PC	PC(18:0/22:4)	40	4	643.85	[M+H]+	838.631	-1.8
							[M+HCO2]-	882.622	-0.2	822.6023 [M-CH3]-; 331.2630 [FA(22:4)]-; 283.2622 [FA(18:0)]-
Var_084	Liver	PC	PC(40:4)	40	4	654.92	[M+H]+	838.631	-1.8
							[M+HCO2]-	882.622	-0.2
Var_085	Liver	PC	PC(18:0/22:6)	40	6	601.27	[M+H]+	834.602	0.8
							[M+HCO2]-	878.592	0.6	818.5701 [M-CH3]-; 327.2314 [FA(22:6)]-; 283.2621 [FA(18:0)]-
Var_086	Liver	PE	PE(32:1)	32	1	587.57	[M+H]+	690.507	-1.2
							[M-H]-	688.492	0.1
Var_087	Liver	PE	PE(16:0/18:1)	34	1	628.42	[M+H]+	718.538	-0.4
							[M-H]-	716.524	1.2	281.2470 [FA(18:1)]-; 255.2319 [FA(16:0)]-
Var_088	Liver	PE	PE(16:0/18:2)	34	2	593.36	[M+H]+	716.524	0.7
							[M-H]-	714.508	1	279.2316 [FA(18:2)]-; 255.2319 [FA(16:0)]-
Var_089	Liver	PE	PE(18:0/18:2)	36	2	633.71	[M+H]+	744.554	0.2
							[M-H]-	742.539	1	279.2314 [FA(18:2)]-; 283.2635 [FA(18:0)]-
Var_090	Liver	PE	PE(16:0/20:4)	36	4	582.3	[M+H]+	740.523	-0.1
							[M-H]-	738.508	0.9	303.2319 [FA(20:4)]-; 255.2305 [FA(16:0)]-
Var_091	Liver	PE	PE(18:0/20:4)	38	4	622.83	[M+H]+	768.554	0
							[M-H]-	766.54	2	303.2309 [FA(20:4)]-; 283.2619 [FA(18:0)]-
Var_092	Liver	PE	PE(18:1/20:4)>PE(16:0/22:5)	38	5	580.71	[M+H]+	766.538	-0.4
							[M-H]-	764.524	0.9	303.2314 [FA(20:4)]-; 281.2465 [FA(18:1)]-; 329.2468 [FA(22:5)]-; 255.2303 [FA(16:0)]-
Var_093	Liver	PE	PE(16:0/22:6)	38	6	566.3	[M+H]+	764.522	-0.8
							[M-H]-	762.508	0.7	255.2310 [FA(16:0)]-; 327.2311 [FA(22:6)]-
Var_094	Liver	PE	PE(18:0/22:4)	40	4	648.3	[M+H]+	796.588	3
							[M-H]-	794.57	0.4	331.2629 [FA(22:4)]-; 283.2633 [FA(18:0)]-
Var_095	Liver	PE	PE(40:6)	40	6	607.25	[M+H]+	792.555	0.5
							[M-H]-	790.54	1.3
Var_096	Liver	PE	PE(40:7)	40	7	565.34	[M+H]+	790.537	-1.7
							[M-H]-	788.527	5
Var_097	Liver	etherPE	PE(O-16:1/20:4)	36	5	601.61	[M+H]+	724.528	0
							[M-H]-	722.513	0.4	303.2310 [FA(20:4)]-; 436.2803 [LPE(O-16:1)-H]-
Var_098	Liver	etherPE	PE(O-16:1/22:4)	38	5	629.64	[M+H]+	752.559	-1
							[M-H]-	750.544	0.7	331.2634 [FA(20:4)]-; 436.2834 [LPE(O-16:1)-H]-
Var_099	Liver	etherPE	PE(O-18:1/20:4)	38	5	640.68	[M+H]+	752.559	-1
							[M-H]-	750.544	0.7	303.2310 [FA(20:4)]-; 464.3142 [LPE(O-16:1)-H]-
Var_100	Liver	PG	PG(34:2)	34	2	531.55	[M-H]-	745.502	-0.3
Var_101	Liver	PG	PG(36:2)	36	2	573.39	[M-H]-	773.533	0
Var_102	Liver	PI	PI(16:0/20:4)	36	4	513.56	[M-H]-	857.518	-0.3	255.2316 [FA(16:0)]-; 303.2311 [FA(20:4)]-; 241.0088 [Inositolphosphate-H2O-H]-
Var_103	Liver	PI	PI(18:0/20:4)	38	4	556.32	[M-H]-	885.55	0.4	283.2626 [FA(18:0)]-; 303.2311 [FA(20:4)]-; 241.0089 [Inositolphosphate-H2O-H]-
Var_104	Liver	PI	PI(18:1/20:4)	38	5	514.26	[M-H]-	883.533	-0.8	281.2463 [FA(18:1)]-; 303.2318 [FA(20:4)]-; 241.0090 [Inositolphosphate-H2O-H]-
Var_105	Liver	PI	PI(16:0/22:6)	38	6	499.19	[M-H]-	881.518	-0.5	255.2299 [FA(16:0)]-; 327.2320 [FA(22:6)]-; 241.0107 [Inositolphosphate-H2O-H]-
Var_106	Liver	PI	PI(40:5)	40	5	554.73	[M-H]-	911.563	-2
Var_107	Liver	PI	PI(18:0/22:5)	40	5	571.14	[M-H]-	911.563	-2	283.2614 [FA(18:0)]-; 329.2448 [FA(22:5)]-; 241.0096 [Inositolphosphate-H2O-H]-
Var_108	Liver	Cer	Cer(d34:1)	34	1	621.44	[M+HCO2]-	582.51	0.8
							[M+H-H2O]+	520.51	1.9
Var_109	Liver	Cer	Cer(d40:2)	40	2	691.24	[M+HCO2]-	664.587	-0.7
							[M+H-H2O]+	602.582	-8.5
Var_110	Liver	Cer	Cer(d40:2)	40	2	695.6	[M+HCO2]-	664.587	-0.7
							[M+H-H2O]+	602.582	-8.5
Var_111	Liver	Cer	Cer(d41:1)	41	1	747.26	[M+HCO2]-	680.62	0.4
							[M+H-H2O]+	618.619	-0.5
Var_112	Liver	Cer	Cer(d42:1)	42	1	757.14	[M+HCO2]-	694.636	0.9
							[M+H-H2O]+	632.635	0.4
Var_113	Liver	Cer	Cer(d42:1)	42	1	763.27	[M+HCO2]-	694.636	0.9
							[M+H-H2O]+	632.635	0.4
Var_114	Liver	Cer	Cer(d42:2)	42	2	724.47	[M+HCO2]-	692.62	0.5
							[M+H-H2O]+	630.619	-0.4
Var_115	Liver	Cer	Cer(d42:3)	42	3	691.05	[M+HCO2]-	690.604	0.1
							[M+H-H2O]+	628.601	-2.9
Var_116	Liver	Cer	Cer(d44:1)	44	1	794.19	[M+HCO2]-	722.666	-0.3
							[M+H-H2O]+	660.664	-3.2
Var_117	Liver	SM	SM(d34:1)	34	1	582.26	[M+H]+	703.576	0.4
							[M+HCO2]-	747.565	0
Var_118	Liver	SM	SM(d36:1)	36	1	628.94	[M+H]+	731.606	-0.5
							[M+HCO2]-	775.596	-0.5
Var_119	Liver	SM	SM(d40:1)	40	1	710.47	[M+H]+	787.668	-1.4
							[M+HCO2]-	831.659	0.3
Var_120	Liver	SM	SM(d40:2)	40	2	665.22	[M+H]+	785.651	-3.8
							[M+HCO2]-	829.643	-0.2
Var_121	Liver	SM	SM(d41:1)	41	1	730.29	[M+H]+	801.684	-1.7
							[M+HCO2]-	845.675	-0.2
Var_122	Liver	SM	SM(d42:1)	42	1	749.72	[M+H]+	815.699	-1.3
							[M+HCO2]-	859.691	0.6
Var_123	Liver	SM	SM(d42:2)	42	2	703.07	[M+H]+	813.684	-0.9
							[M+HCO2]-	857.675	0.5
Var_124	Liver	SM	SM(d42:3)	42	3	664.9	[M+H]+	811.665	-5.3
							[M+HCO2]-	855.659	-0.4
Var_125	Jejunum	FA	FA(16:1)	16	1	198.89	[M-H]-	253.215	-6.5
Var_126	Jejunum	FA	FA(16:1)	16	1	208.24	[M-H]-	253.215	-6.5
Var_127	Jejunum	FA	FA(17:0)	17	0	293.7	[M-H]-	269.247	-5.7
Var_128	Jejunum	FA	FA(18:0)	18	0	339.8	[M-H]-	283.263	-1.9
Var_129	Jejunum	FA	FA(18:1)	18	1	259.22	[M-H]-	281.247	-2.7
Var_130	Jejunum	FA	FA(18:1)	18	1	265.43	[M-H]-	281.247	-2.7
Var_131	Jejunum	FA	FA(18:2)	18	2	210.4	[M-H]-	279.232	0.1
Var_132	Jejunum	FA	FA(20:0)	20	0	431.93	[M-H]-	311.294	-3.8
Var_133	Jejunum	FA	FA(20:1)	20	1	348.27	[M-H]-	309.278	-3.8
Var_134	Jejunum	FA	FA(20:2)	20	2	282.92	[M-H]-	307.262	-3.8
Var_135	Jejunum	FA	FA(20:2)	20	2	291.57	[M-H]-	307.262	-3.8
Var_136	Jejunum	FA	FA(20:3)	20	3	235.57	[M-H]-	305.247	-3.2
Var_137	Jejunum	FA	FA(20:3)	20	3	252.04	[M-H]-	305.247	-3.2
Var_138	Jejunum	FA	FA(20:5)	20	5	166.07	[M-H]-	301.215	-4.4
Var_139	Jejunum	FA	FA(22:1)	22	1	434.23	[M-H]-	337.31	-3.5
Var_140	Jejunum	FA	FA(22:1)	22	1	441.93	[M-H]-	337.31	-3.5
Var_141	Jejunum	FA	FA(22:2)	22	2	365.74	[M-H]-	335.294	-3.9
Var_142	Jejunum	FA	FA(22:2)	22	2	372.57	[M-H]-	335.294	-3.9
Var_143	Jejunum	FA	FA(22:3)	22	3	307.05	[M-H]-	333.278	-5.3
Var_144	Jejunum	FA	FA(22:3)	22	3	321.23	[M-H]-	333.278	-5.3
Var_145	Jejunum	FA	FA(22:4)	22	4	262.32	[M-H]-	331.263	-1.4
Var_146	Jejunum	FA	FA(22:5)	22	5	214.25	[M-H]-	329.247	-2.6
Var_147	Jejunum	FA	FA(22:5)	22	5	229.93	[M-H]-	329.247	-2.6
Var_148	Jejunum	FA	FA(22:6)	22	6	189.14	[M-H]-	327.231	-2.7
Var_149	Jejunum	FA	FA(23:0)	23	0	535.07	[M-H]-	353.341	-3.5
Var_150	Jejunum	FA	FA(23:0)	23	0	547.17	[M-H]-	353.341	-3.5
Var_151	Jejunum	FA	FA(24:0)	24	0	579.19	[M-H]-	367.357	-2.7
Var_152	Jejunum	FA	FA(24:1)	24	1	509.31	[M-H]-	365.341	-3.2
Var_153	Jejunum	FA	FA(24:1)	24	1	519.69	[M-H]-	365.341	-3.2
Var_154	Jejunum	FA	FA(24:2)	24	2	446.93	[M-H]-	363.325	-3.4
Var_155	Jejunum	FA	FA(24:5)	24	5	279.38	[M-H]-	357.278	-3
Var_156	Jejunum	FA	FA(24:5)	24	5	292.08	[M-H]-	357.278	-3
Var_157	Jejunum	FA	FA(24:6)	24	6	242.96	[M-H]-	355.263	-3.2
Var_158	Jejunum	LPAF	LPAF(16:0)	16	0	294.94	[M+H]+	482.363	3.2
							[M+HCO2]-	526.351	-0.1
Var_159	Jejunum	LPAF	LPAF(16:1)	16	1	286.94	[M+H]+	480.345	-0.8
							[M+HCO2]-	524.335	-0.6
Var_160	Jejunum	LPAF	LPAF(18:0)	18	0	365.95	[M+H]+	510.392	0.4
							[M+HCO2]-	554.382	-0.7
Var_161	Jejunum	LPAF	LPAF(18:1)	18	1	303.12	[M+H]+	508.377	0.4
							[M+HCO2]-	552.366	-0.2
Var_162	Jejunum	LPAF	LPAF(20:0)	20	0	432.12	[M+H]+	538.424	-0.1
							[M+HCO2]-	582.413	-0.7
Var_163	Jejunum	LPAF	LPAF(22:0)	22	0	492.11	[M+H]+	566.454	-1.1
							[M+HCO2]-	610.444	-1.4
Var_164	Jejunum	LPC	LPC(16:0)	16	0	248.94	[M+H]+	496.341	0.5
							[M+HCO2]-	540.33	0
Var_165	Jejunum	LPC	LPC(16:0)	16	0	263.59	[M+H]+	496.341	0.5
							[M+HCO2]-	540.33	0
Var_166	Jejunum	LPC	LPC(18:0)	18	0	317.75	[M+H]+	524.372	0.9
							[M+HCO2]-	568.362	0.3
Var_167	Jejunum	LPC	LPC(18:0)	18	0	333.56	[M+H]+	524.372	0.9
							[M+HCO2]-	568.362	0.3
Var_168	Jejunum	LPE	LPE(16:0)	16	0	268.41	[M+H]+	454.292	-2.2
							[M-H]-	452.277	-0.4
Var_169	Jejunum	LPE	LPE(18:0)	18	0	339.19	[M+H]+	482.325	0
							[M-H]-	480.309	0.7
Var_170	Jejunum	LPE	LPE(18:1)	18	1	265.32	[M-H]-	478.293	-1
Var_171	Jejunum	LPE	LPE(18:1)	18	1	278.44	[M-H]-	478.293	-1
Var_172	Jejunum	LPE	LPE(18:1)	18	1	288.86	[M-H]-	478.293	-1
Var_173	Jejunum	etherLPE	LPE(O-16:1)	16	1	294.99	[M+H]+	438.298	-0.9
							[M-H]-	436.283	0
Var_174	Jejunum	etherLPE	LPE(O-17:1)	17	1	319.27	[M+H]+	452.313	-2
							[M-H]-	450.298	-1
Var_175	Jejunum	etherLPE	LPE(O-17:1)	17	1	331.4	[M+H]+	452.313	-2
							[M-H]-	450.298	-1
Var_176	Jejunum	etherLPE	LPE(O-18:1)	18	1	356.01	[M+H]+	466.33	-0.1
							[M-H]-	464.314	0.7
Var_177	Jejunum	etherLPE	LPE(O-18:1)	18	1	365.5	[M+H]+	466.33	-0.1
							[M-H]-	464.314	0.7
Var_178	Jejunum	etherLPE	LPE(O-18:2)	18	2	303.01	[M+H]+	464.314	-1.1
							[M-H]-	462.299	0.3
Var_179	Jejunum	etherLPE	LPE(O-18:2)	18	2	310.99	[M+H]+	464.314	-1.1
							[M-H]-	462.299	0.3
Var_180	Jejunum	etherLPE	LPE(O-18:3)	18	3	254.21	[M+H]+	462.298	-0.9
							[M-H]-	460.282	-1
Var_181	Jejunum	etherLPE	LPE(O-18:3)	18	3	262.47	[M+H]+	462.298	-0.9
							[M-H]-	460.282	-1
Var_182	Jejunum	etherLPE	LPE(O-20:0)	20	0	440	[M+H]+	496.377	0.8
							[M-H]-	494.361	0.8
Var_183	Jejunum	etherLPE	LPE(O-20:1)	20	1	431.19	[M+H]+	494.361	-0.6
							[M-H]-	492.346	0.9
Var_184	Jejunum	LPI	LPI(18:0)	18	0	556.61	[M-H]-	599.32	-0.1
Var_185	Jejunum	PC	PC(28:0)	28	0	530.49	[M+H]+	678.505	-2.9
							[M+HCO2]-	722.497	-0.3
Var_186	Jejunum	PC	PC(30:0)	30	0	579.75	[M+H]+	706.54	1.9
							[M+HCO2]-	750.53	1.4
Var_187	Jejunum	PC	PC(31:0)	31	0	594.13	[M+H]+	720.554	-0.3
							[M+HCO2]-	764.543	-0.9
Var_188	Jejunum	PC	PC(31:0)	31	0	602.66	[M+H]+	720.554	-0.3
							[M+HCO2]-	764.543	-0.9
Var_189	Jejunum	PC	PC(32:0)	32	0	624.41	[M+H]+	734.57	0
							[M+HCO2]-	778.56	0.7
Var_190	Jejunum	PC	PC(32:1)	32	1	580.95	[M+H]+	732.553	-1.1
							[M+HCO2]-	776.544	-0.4
Var_191	Jejunum	PC	PC(32:1)	32	1	586.23	[M+H]+	732.553	-1.1
							[M+HCO2]-	776.544	-0.4
Var_192	Jejunum	PC	PC(32:1)	32	1	596.51	[M+H]+	732.553	-1.1
							[M+HCO2]-	776.544	-0.4
Var_193	Jejunum	PC	PC(32:2)	32	2	541.04	[M+H]+	732.553	-1.1
							[M+HCO2]-	776.544	-0.4
Var_194	Jejunum	PC	PC(34:0)	34	0	665.27	[M+H]+	762.601	-0.5
							[M+HCO2]-	806.593	2.3
Var_195	Jejunum	PC	PC(34:1)	34	1	623.13	[M+H]+	760.585	-0.4
							[M+HCO2]-	804.576	0.6
Var_196	Jejunum	PC	PC(34:2)	34	2	587.17	[M+H]+	758.57	0.1
							[M+HCO2]-	802.561	0.8
Var_197	Jejunum	PC	PC(34:4)	34	4	529.92	[M+H]+	754.536	-3.2
							[M+HCO2]-	798.528	-0.7
Var_198	Jejunum	PC	PC(36:1)	36	1	663.05	[M+H]+	788.616	-0.6
							[M+HCO2]-	832.607	0.3
Var_199	Jejunum	PC	PC(36:2)	36	2	629.21	[M+H]+	786.601	-0.3
							[M+HCO2]-	830.591	0.5
Var_200	Jejunum	PC	PC(16:0/20:4)	36	4	575.29	[M+H]+	782.57	0.3
							[M+HCO2]-	826.56	0.6	766.5399 [M-CH3]-; 303.2316 [FA(20:4)]-; 255.2313 [FA(16:0)]-
Var_201	Jejunum	PC	PC(38:0)	38	0	678.21	[M+H]+	818.669	6.8
							[M+HCO2]-	862.66	7.8
Var_202	Jejunum	PC	PC(38:2)	38	2	665.54	[M+H]+	814.632	-0.4
							[M+HCO2]-	858.623	1.2
Var_203	Jejunum	PC	PC(16:0/22:4)	38	4	617.65	[M+H]+	810.601	-0.8
							[M+HCO2]-	854.591	0.4	794.5715 [M-CH3]-; 331.2625 [FA(22:4)]-; 255.2313 [FA(16:0)]-
Var_204	Jejunum	PC	PC(38:4)	38	4	625.47	[M+H]+	810.601	-0.8
							[M+HCO2]-	854.591	0.4
Var_205	Jejunum	PC	PC(38:5)	38	5	574.56	[M+H]+	808.584	-1.5
							[M+HCO2]-	852.575	-0.1
Var_206	Jejunum	PC	PC(18:1/20:4)	38	5	589.79	[M+H]+	808.584	-1.5
							[M+HCO2]-	852.575	-0.1	792.5553 [M-CH3]-; 303.2317 [FA(20:4)]-; 281.2472 [FA(18:1)]-
Var_207	Jejunum	PC	PC(16:0/22:6)	38	6	559.83	[M+H]+	806.568	-2.2
							[M+HCO2]-	850.56	-0.2	790.5380 [M-CH3]-; 327.2298 [FA(22:6)]-; 255.2306 [FA(16:0)]-
Var_208	Jejunum	PC	PC(40:0)	40	0	711.01	[M+H]+	846.701	7
							[M+HCO2]-	890.693	8.6
Var_209	Jejunum	PC	PC(16:0/24:4)	40	4	636.49	[M+H]+	838.631	-1.8
							[M+HCO2]-	882.622	-0.5	822.6011 [M-CH3]-; 359.2956 [FA(24:4)]-; 255.2311 [FA(16:0)]-
Var_210	Jejunum	PC	PC(18:0/22:4)	40	4	644.62	[M+H]+	838.631	-1.8
							[M+HCO2]-	882.622	-0.5	822.6023 [M-CH3]-; 331.2637 [FA(22:4)]-; 283.2625 [FA(18:0)]-
Var_211	Jejunum	PC	PC(40:4)	40	4	655.97	[M+H]+	838.631	-1.8
							[M+HCO2]-	882.622	-0.5
Var_212	Jejunum	PC	PC(40:5)	40	5	603.34	[M+H]+	836.614	-3.4
							[M+HCO2]-	880.606	-0.8
Var_213	Jejunum	PC	PC(20:1/20:4) > PC(18:0/22:5) > PC(16:0/24:5)	40	5	615.44	[M+H]+	836.614	-3.4
							[M+HCO2]-	880.606	-0.8	820.5861 [M-CH3]-; 303.2314 [FA(20:4)]-; 329.2461 [FA(22:5)]-; 309.2791 [FA(20:1)]-; 383.2637 [FA(18:0)]-; 357.2779 [FA(25:5)]-; 355.2297 [FA(16:0)]-
Var_214	Jejunum	PC	PC(40:5)	40	5	631.12	[M+H]+	836.614	-3.4
							[M+HCO2]-	880.606	-0.8
Var_215	Jejunum	PC	PC(40:6)	40	6	601.88	[M+H]+	834.6	-1.9
							[M+HCO2]-	878.591	-0.5
Var_216	Jejunum	etherPC	PC(O-32:0)	32	0	653.84	[M+H]+	720.59	-1.1
							[M+HCO2]-	764.579	-2.5
Var_217	Jejunum	etherPC	PC(O-34:0)	34	0	693.85	[M+H]+	748.621	-1.3
							[M+HCO2]-	792.61	-2
Var_218	Jejunum	etherPC	PC(O-40:1)	40	1	715.75	[M+H]+	830.705	6
							[M+HCO2]-	874.698	9
Var_219	Jejunum	PE	PE(28:0)	28	0	538.8	[M+H]+	636.459	-2.4
							[M-H]-	634.444	-0.4
Var_220	Jejunum	PE	PE(32:0)	32	0	629.91	[M+H]+	692.522	-0.9
							[M-H]-	690.507	0
Var_221	Jejunum	PE	PE(34:2)	34	2	594.04	[M+H]+	716.523	-0.7
							[M-H]-	714.508	0.4
Var_222	Jejunum	PE	PE(36:2)	36	2	634.41	[M+H]+	744.554	-0.2
							[M-H]-	742.539	0.4
Var_223	Jejunum	PE	PE(36:4)	36	4	582.76	[M+H]+	740.522	-1.3
							[M-H]-	738.508	1.1
Var_224	Jejunum	PE	PE(38:4)	38	4	623.32	[M+H]+	768.554	-0.7
							[M-H]-	766.539	0.8
Var_225	Jejunum	PE	PE(40:6)	40	6	607.75	[M+H]+	792.554	0
							[M-H]-	790.539	0.3
Var_226	Jejunum	etherPE	PE(O-36:2)	36	2	685.37	[M+H]+	730.573	-2.2
							[M-H]-	728.559	0.1
Var_227	Jejunum	etherPE	PE(O-38:2)	38	2	696.29	[M+H]+	758.604	-3.4
							[M-H]-	756.59	-0.5
Var_228	Jejunum	etherPE	PE(P-16:0/22:4) or PE(O-16:1/22:4)	38	5	630.04	[M+H]+	752.559	-0.6
							[M-H]-	750.544	0.8	331.2630 [FA(22:4)]-; 436.2830 [LPE(O-16:1)-H]-
Var_229	Jejunum	etherPE	PE(P-18:0/20:4) or PE(O-18:1/20:4)	38	5	641.5	[M+H]+	752.559	-0.6
							[M-H]-	750.544	0.8	303.2311 [FA(22:4)]-; 464.3120 [LPE(O-18:1)-H]-
Var_230	Jejunum	PI	PI(34:1)	34	1	558.44	[M-H]-	835.533	-0.4
Var_231	Jejunum	PI	PI(34:2)	34	2	523.34	[M-H]-	833.518	-0.3
Var_232	Jejunum	PI	PI(36:2)	36	2	566.07	[M-H]-	861.549	-0.2
Var_233	Jejunum	PI	PI(36:4)	36	4	513.93	[M-H]-	857.518	-0.1
Var_234	Jejunum	PI	PI(38:3)	38	3	573.52	[M-H]-	887.564	-1.2
Var_235	Jejunum	PI	PI(38:4)	38	4	556.68	[M-H]-	885.549	0.2
Var_236	Jejunum	PI	PI(38:5)	38	5	514.88	[M-H]-	883.533	-0.7
Var_237	Jejunum	PI	PI(40:4)	40	4	583.99	[M-H]-	913.58	-1
Var_238	Jejunum	PI	PI(40:6)	40	6	542.22	[M-H]-	909.548	-1.4
Var_239	Jejunum	CholLipid	Cholesterol	NA	NA	572.96	[cholesterol.fragment]+	369.352	-1
Var_240	Jejunum	CholLipid	CE	NA	NA	859.81	[cholesterol.fragment]+	369.351	-1
Var_241	Jejunum	CholLipid	CE	NA	NA	910.18	[cholesterol.fragment]+	369.352	-1
Var_242	Jejunum	TG	TG(40:0)	40	0	774.03	[M+NH4]+	712.644	-2.4
							[M+Na]+	717.596	-6.3
Var_243	Jejunum	TG	TG(42:0)	42	0	801.88	[M+NH4]+	740.676	-0.8
							[M+Na]+	745.631	-1.8
Var_244	Jejunum	TG	TG(46:0)	46	0	855.26	[M+NH4]+	796.74	0.2
							[M+Na]+	801.694	-0.9
Var_245	Jejunum	TG	TG(46:1)	46	1	825.65	[M+NH4]+	794.722	-1.8
							[M+Na]+	799.677	-2.3
Var_246	Jejunum	TG	TG(46:2)	46	2	797.39	[M+NH4]+	792.707	-1.3
							[M+Na]+	797.662	-2.1
Var_247	Jejunum	TG	TG(48:0)	48	0	880.03	[M+NH4]+	824.771	0.6
							[M+Na]+	829.726	0.3
Var_248	Jejunum	TG	TG(48:1)	48	1	851.43	[M+NH4]+	822.756	0.7
							[M+Na]+	827.71	-0.1
Var_249	Jejunum	TG	TG(48:2)	48	2	824.15	[M+NH4]+	820.739	-1.1
							[M+Na]+	825.693	-1.7
Var_250	Jejunum	TG	TG(49:1)	49	1	857.86	[M+NH4]+	836.77	-1
							[M+Na]+	841.724	-2.4
Var_251	Jejunum	TG	TG(49:1)	49	1	863.32	[M+NH4]+	836.77	-1
							[M+Na]+	841.724	-2.4
Var_252	Jejunum	TG	TG(50:0)	50	0	903.28	[M+NH4]+	852.802	-0.3
							[M+Na]+	857.756	-1.6
Var_253	Jejunum	TG	TG(50:1)	50	1	875.49	[M+NH4]+	850.79	4.1
							[M+Na]+	855.742	0
Var_254	Jejunum	TG	TG(50:2)	50	2	849.73	[M+NH4]+	848.775	5.5
							[M+Na]+	853.726	-0.1
Var_255	Jejunum	TG	TG(52:2)	52	2	871.56	[M+NH4]+	848.775	5.5
							[M+Na]+	853.726	-0.1
Var_256	Jejunum	TG	TG(52:3)	52	3	846.02	[M+NH4]+	874.791	5.2
							[M+Na]+	879.741	-0.7
Var_257	Jejunum	TG	TG(54:3)	54	3	859.88	[M+NH4]+	902.818	-0.1
							[M+Na]+	907.772	-0.7
Var_258	Jejunum	TG	TG(54:3)	54	3	868.66	[M+NH4]+	902.818	-0.1
							[M+Na]+	907.772	-0.7
Var_259	Jejunum	TG	TG(54:4)	54	4	842.5	[M+NH4]+	900.802	-0.4
							[M+Na]+	905.756	-1.6
Var_260	Jejunum	TG	TG(54:5)	54	5	817.25	[M+NH4]+	898.787	0.4
							[M+Na]+	903.741	-0.9
Var_261	Jejunum	TG	TG(54:6)	54	6	792.58	[M+NH4]+	896.769	-1.4
							[M+Na]+	901.725	-1.5
Var_262	Jejunum	TG	TG(54:7)	54	7	769.26	[M+NH4]+	894.753	-2.3
							[M+Na]+	899.709	-2.1
Var_263	Jejunum	TG	TG(56:3)	56	3	891.5	[M+NH4]+	930.849	-0.2
							[M+Na]+	935.806	2
Var_264	Jejunum	Cer	Cer(d34:1)	34	1	621.74	[M+H-H2O]+	520.51	1.9
							[M+HCO2]-	582.51	0.6
Var_265	Jejunum	Cer	Cer(d34:2)	34	2	579.24	[M+H-H2O]+	518.493	-0.9
							[M+HCO2]-	580.494	0
Var_266	Jejunum	Cer	Cer(d35:1)	35	1	642.38	[M+H-H2O]+	534.526	2.2
							[M+HCO2]-	596.526	0.9
Var_267	Jejunum	Cer	Cer(d36:2)	36	2	622.7	[M+HCO2]-	608.523	-4.3
							[M+H-H2O]+	546.524	-2.1
Var_268	Jejunum	Cer	Cer(d42:1)	42	1	763.16	[M+H-H2O]+	632.634	-1.2
							[M+HCO2]-	694.635	0.1
Var_269	Jejunum	Cer	Cer(d42:2)	42	2	724.29	[M+H-H2O]+	630.617	-2.6
							[M+HCO2]-	692.619	-0.3
Var_270	Jejunum	Cer	Cer(d42:2)	42	2	728.66	[M+H-H2O]+	630.617	-2.6
							[M+HCO2]-	692.619	-0.3
Var_271	Jejunum	SM	SM(d34:1)	34	1	582.95	[M+H]+	703.575	-0.5
							[M+HCO2]-	747.565	0
Var_272	Jejunum	SM	SM(d34:2)	34	2	535.24	[M+H]+	701.558	-2.8
							[M+HCO2]-	745.548	-1.6
Var_273	Jejunum	SM	SM(d34:2)	34	2	543.5	[M+H]+	701.558	-2.8
							[M+HCO2]-	745.548	-1.6
Var_274	Jejunum	SM	SM(d35:1)	35	1	607.03	[M+H]+	717.591	-0.7
							[M+HCO2]-	761.581	0.4
Var_275	Jejunum	SM	SM(d36:1)	36	1	629.57	[M+H]+	731.607	-0.1
							[M+HCO2]-	775.595	-1.4
Var_276	Jejunum	SM	SM(d38:1)	38	1	671.61	[M+H]+	759.638	-0.5
							[M+HCO2]-	803.628	0.3
Var_277	Jejunum	SM	SM(d40:1)	40	1	711.5	[M+H]+	787.668	-1.5
							[M+HCO2]-	831.659	0
Var_278	Jejunum	SM	SM(d40:2)	40	2	669.96	[M+H]+	785.651	-3.7
							[M+HCO2]-	829.643	-0.1
Var_279	Jejunum	SM	SM(d41:1)	41	1	731.77	[M+H]+	801.683	-3
							[M+HCO2]-	845.674	-0.4
Var_280	Jejunum	SM	SM(d42:1)	42	1	751.88	[M+H]+	815.699	-2.2
							[M+HCO2]-	859.691	0.1
Var_281	Jejunum	SM	SM(d42:2)	42	2	704.3	[M+H]+	813.684	-1.2
							[M+HCO2]-	857.675	0.2
Var_282	Jejunum	SM	SM(d42:3)	42	3	665.77	[M+H]+	811.666	-3.5
							[M+HCO2]-	855.659	0

## Sheet: Signal
Sample.ID	Var_001	Var_002	Var_003	Var_004	Var_005	Var_006	Var_007	Var_008	Var_009	Var_010	Var_011	Var_012	Var_013	Var_014	Var_015	Var_016	Var_017	Var_018	Var_019	Var_020	Var_021	Var_022	Var_023	Var_024	Var_025	Var_026	Var_027	Var_028	Var_029	Var_030	Var_031	Var_032	Var_033	Var_034	Var_035	Var_036	Var_037	Var_038	Var_039	Var_040	Var_041	Var_042	Var_043	Var_044	Var_045	Var_046	Var_047	Var_048	Var_049
Control	3.7437e+06	124938	34342.8	3.23722e+06	2.27615e+06	1.8392e+06	34907.6	89996.9	16844.1	226153	140500	5.5502e+06	113368	750303	1.24923e+06	1.30751e+06	14714.7	248289	294531	357304	121760	935071	193475	221235	1.43047e+06	1.53349e+06	982917	7.87968e+06	1.12266e+07	675300	1.69486e+06	1.00661e+06	4.72467e+07	1.76582e+07	1.85172e+07	1.33563e+07	498879	1.3258e+06	3.90118e+06	6.05076e+06	1.24476e+06	5.25108e+06	3.05853e+06	2.36762e+06	1.64363e+06	99398.7	3.59476e+06	90360.7	4.26542e+06
Control	4.54533e+06	162651	40449.4	3.89007e+06	2.25793e+06	3.00727e+06	33246.5	127398	13204.7	271822	118721	9.32993e+06	131610	857044	1.67932e+06	1.49031e+06	12112	319067	325354	297523	141135	1.10156e+06	380019	259566	2.33002e+06	3.22192e+06	2.16687e+06	1.22904e+07	1.95423e+07	1.93938e+06	1.75321e+06	1.48423e+06	7.44224e+07	3.75343e+07	2.04126e+07	1.88554e+07	907566	1.37237e+06	1.06889e+07	6.52589e+06	1.98821e+06	8.70613e+06	5.78746e+06	3.00096e+06	2.14402e+06	107800	4.26979e+06	94000.8	4.9641e+06
Control	3.14245e+06	103221	29182.4	2.62708e+06	1.54091e+06	2.04187e+06	25659.9	98065.7	11812.4	235510	96428.7	5.25706e+06	114285	611031	1.00942e+06	1.34709e+06	8768.48	248599	368309	345222	140365	928754	217524	273862	1.62779e+06	2.2262e+06	1.52456e+06	1.03528e+07	1.69371e+07	1.42465e+06	2.20708e+06	1.67987e+06	7.29318e+07	3.60601e+07	2.02209e+07	1.67576e+07	870792	1.43244e+06	1.15327e+07	5.41812e+06	1.49424e+06	8.42129e+06	4.54718e+06	3.18276e+06	1.79554e+06	73436	2.5516e+06	71101.4	2.76725e+06
Control	3.77314e+06	104933	34026.2	2.84187e+06	1.66299e+06	2.29331e+06	31054.2	101528	11785.2	183577	96126.4	6.25809e+06	99343.9	947460	1.21707e+06	1.19864e+06	12554.9	216705	223874	215879	105606	870567	214000	227984	1.44775e+06	1.46397e+06	1.03394e+06	5.36815e+06	8.8121e+06	844574	781499	595746	3.53692e+07	1.9339e+07	1.09321e+07	9.30869e+06	630053	731782	6.47387e+06	2.46798e+06	970970	4.60187e+06	2.90746e+06	1.34253e+06	1.21849e+06	76051.7	3.36776e+06	65980.8	3.81089e+06
Control	3.68508e+06	174503	29162.5	2.85628e+06	2.87356e+06	2.28671e+06	26944.4	97810.6	15314.6	194008	109772	5.69794e+06	120215	768752	1.24878e+06	1.28009e+06	17563	304332	335407	412422	148942	977613	324110	237530	1.81958e+06	2.98762e+06	2.20309e+06	1.20971e+07	2.06217e+07	1.59813e+06	2.65589e+06	1.61611e+06	7.27195e+07	2.94269e+07	2.89931e+07	2.36893e+07	673358	1.89564e+06	4.29032e+06	6.4942e+06	997750	6.02498e+06	2.24033e+06	2.52036e+06	1.88631e+06	95024.2	3.87061e+06	80781.6	4.14372e+06
Control	3.42121e+06	126513	27475	2.41888e+06	2.00874e+06	2.05427e+06	24856.9	90743.4	15244.1	215647	105113	4.23744e+06	113531	717961	1.0028e+06	1.37055e+06	12577.2	275560	299071	268909	128266	958813	255373	243856	2.21122e+06	2.64058e+06	1.7419e+06	1.36572e+07	1.91417e+07	1.34093e+06	2.26254e+06	1.6009e+06	7.46938e+07	3.35745e+07	2.23522e+07	1.78292e+07	722220	1.44416e+06	9.88216e+06	6.97416e+06	1.39198e+06	8.94524e+06	4.30669e+06	3.50825e+06	2.09049e+06	100576	3.6147e+06	93048.7	4.36671e+06
i.V. 6h	3.62687e+06	221034	29584	2.40027e+06	2.1968e+06	2.00506e+06	27288.4	90807.6	11812.9	188849	101981	4.35137e+06	145958	708604	904646	1.14782e+06	8570.3	282908	361312	345046	166524	1.18172e+06	549797	303058	2.40765e+06	5.25122e+06	4.3072e+06	1.72336e+07	3.28224e+07	3.43001e+06	2.88162e+06	2.46169e+06	1.00168e+08	4.81598e+07	2.24375e+07	2.10107e+07	806240	1.25262e+06	1.45802e+07	6.70618e+06	1.84712e+06	1.07991e+07	5.3204e+06	4.07618e+06	2.38875e+06	94447.4	4.45501e+06	72324.5	4.0739e+06
i.V. 6h	7.16071e+06	974554	40599.4	3.03684e+06	1.09939e+07	6.18016e+06	31264.9	136828	30287	372687	245984	6.31744e+06	246662	1.07441e+06	1.58057e+06	1.26666e+06	7085.25	184282	282019	229136	111933	1.26893e+06	743200	305058	3.08512e+06	7.92532e+06	6.85641e+06	2.25244e+07	4.54613e+07	2.71185e+06	3.79742e+06	2.15323e+06	9.10347e+07	3.05612e+07	2.53825e+07	1.81311e+07	503860	1.16543e+06	652935	6.92253e+06	705913	3.31512e+06	1.10362e+06	3.05314e+06	1.0376e+06	136116	5.94827e+06	109591	5.74174e+06
i.V. 6h	4.26348e+06	313068	35032	2.42134e+06	3.56799e+06	3.69415e+06	27155.2	130292	20320.8	276105	131958	6.32667e+06	227595	1.32421e+06	1.30756e+06	1.42015e+06	6594.31	234299	350747	348683	153051	998648	304957	303434	1.80503e+06	3.25842e+06	2.73022e+06	1.13697e+07	2.32745e+07	2.58585e+06	2.32188e+06	1.99772e+06	8.29712e+07	4.10377e+07	1.96205e+07	1.92227e+07	855559	1.14276e+06	1.08407e+07	8.31242e+06	1.31282e+06	1.02924e+07	3.52721e+06	3.74964e+06	2.22391e+06	103662	5.00576e+06	93220	5.37647e+06
i.V. 6h	4.97508e+06	197447	29147.5	2.92265e+06	2.8848e+06	3.48735e+06	25688.7	116862	13087.1	208682	120322	7.346e+06	142379	1.34847e+06	1.44268e+06	1.26397e+06	8489.28	208358	343345	392719	163864	1.00995e+06	316030	245011	2.11029e+06	2.48086e+06	1.58156e+06	8.28664e+06	1.29117e+07	1.18492e+06	950650	749915	4.47386e+07	2.3848e+07	1.2825e+07	1.26673e+07	663488	861392	6.64387e+06	3.55954e+06	664825	5.94962e+06	2.12133e+06	1.4765e+06	1.48235e+06	127000	5.75068e+06	86750.5	4.83064e+06
i.V. 6h	3.05678e+06	107047	24745	2.37192e+06	1.62847e+06	1.86387e+06	24365.4	85049.7	11538.7	169028	89923.8	4.90133e+06	107431	740263	1.0494e+06	1.39908e+06	10413.3	246476	263362	267805	116907	854990	184367	239698	1.40226e+06	1.27139e+06	828798	6.25732e+06	9.41842e+06	708967	967252	720317	4.23722e+07	2.01535e+07	1.24716e+07	1.04775e+07	562913	808993	6.35096e+06	3.51849e+06	1.06767e+06	5.12602e+06	2.69814e+06	1.69374e+06	1.46208e+06	96430.6	4.58157e+06	91605.6	4.85102e+06
i.V. 6h	2.84425e+06	147085	20555.5	1.86162e+06	1.74439e+06	1.31163e+06	21727.6	82647.7	14486.9	182341	93959.3	2.80904e+06	107235	630690	791007	1.07299e+06	9389.3	178423	205450	171996	90671.9	1.04354e+06	382773	262238	2.31312e+06	3.99245e+06	2.5742e+06	1.58262e+07	2.34646e+07	1.42938e+06	1.74058e+06	1.08485e+06	6.67606e+07	2.52438e+07	1.90761e+07	1.34549e+07	544695	1.11487e+06	8.71953e+06	4.44264e+06	1.60515e+06	5.62408e+06	3.61516e+06	2.89547e+06	1.79169e+06	84766.4	3.98973e+06	72125.8	4.31651e+06
i.V. 24h	4.01011e+06	82283.5	33967.4	3.46593e+06	1.35513e+06	2.05754e+06	33819.2	72112.2	8294.77	111105	74606.5	4.54841e+06	62217.6	622269	1.03571e+06	1.52267e+06	20853.2	335422	405337	419688	192749	965735	263172	226085	1.59178e+06	1.66546e+06	1.1429e+06	6.13645e+06	1.02024e+07	1.12538e+06	981364	833960	4.64564e+07	2.77332e+07	1.22725e+07	1.11835e+07	949998	877253	7.13687e+06	2.36352e+06	1.16547e+06	4.19262e+06	3.46048e+06	1.40717e+06	1.22745e+06	102904	4.18399e+06	95804.2	5.14022e+06
i.V. 24h	4.37014e+06	183240	36413.4	2.48804e+06	2.56161e+06	2.91956e+06	23813.4	136316	13282.7	240019	110246	5.26099e+06	121866	1.02443e+06	1.09129e+06	1.33798e+06	13705.4	285869	230611	164203	98231.1	1.01751e+06	362477	254474	1.92075e+06	3.2107e+06	2.3155e+06	1.26557e+07	2.25225e+07	1.90873e+06	2.28433e+06	2.0365e+06	8.17893e+07	3.94692e+07	1.79852e+07	1.67042e+07	826148	986681	1.68394e+07	1.84036e+06	1.61747e+06	8.34285e+06	4.98758e+06	1.92757e+06	2.22025e+06	125056	6.64561e+06	85390.2	6.5743e+06
i.V. 24h	6.97799e+06	213308	42749.3	4.57114e+06	3.97998e+06	8.27471e+06	33314.3	116852	10989.3	193737	231574	1.32266e+07	232913	1.85751e+06	2.70169e+06	1.52418e+06	18842.8	688248	778506	754661	357727	1.4828e+06	668518	290855	3.58097e+06	5.07847e+06	3.46725e+06	1.93552e+07	3.4462e+07	3.91855e+06	1.8709e+06	1.85947e+06	1.28762e+08	9.61463e+07	2.46759e+07	3.02572e+07	2.99853e+06	1.23325e+06	2.53982e+07	1.03453e+07	3.29216e+06	2.6404e+07	1.40008e+07	4.70614e+06	2.88992e+06	127181	5.20382e+06	109784	6.27393e+06
i.V. 24h	5.05324e+06	303698	29246.4	2.65868e+06	3.76441e+06	3.68837e+06	28590.6	140798	17129.3	223463	108937	4.02167e+06	115393	536406	1.04343e+06	1.38178e+06	17255.5	378654	419724	420062	238555	1.66167e+06	885018	350470	4.78198e+06	1.10575e+07	7.68978e+06	3.66553e+07	5.97796e+07	4.78567e+06	5.60387e+06	3.95642e+06	1.53067e+08	6.75904e+07	3.36463e+07	2.82686e+07	1.04594e+06	2.10794e+06	1.03666e+07	2.03448e+06	2.04985e+06	5.43436e+06	4.59822e+06	3.43657e+06	1.16894e+06	128016	6.97592e+06	117941	7.02007e+06
i.V. 24h	3.40395e+06	158763	27029.8	2.25974e+06	2.12466e+06	2.48361e+06	23210.8	102438	12412.3	159166	90690	3.73322e+06	97326	586386	1.00621e+06	1.27906e+06	11777.3	333726	371815	343383	166613	1.00651e+06	342908	261087	1.98082e+06	3.88983e+06	3.12968e+06	1.64689e+07	3.23467e+07	3.8182e+06	2.4173e+06	2.54408e+06	1.33547e+08	7.16644e+07	2.73386e+07	2.85134e+07	1.48016e+06	1.60008e+06	1.39069e+07	5.97994e+06	2.76069e+06	1.18811e+07	8.22944e+06	4.63535e+06	1.98968e+06	133614	6.35375e+06	108609	7.09256e+06
i.V. 24h	4.5081e+06	140788	26209.3	2.8581e+06	2.8891e+06	4.35493e+06	30691.3	102932	10868.3	155566	131932	5.71666e+06	204572	1.05265e+06	1.83326e+06	1.47914e+06	17077.7	492609	661196	830389	337791	931322	192900	222967	1.5164e+06	1.61137e+06	1.2231e+06	9.27307e+06	1.75926e+07	1.97125e+06	1.18948e+06	1.08813e+06	9.09143e+07	5.78952e+07	1.99741e+07	2.53551e+07	1.54998e+06	1.21348e+06	1.18121e+07	8.92444e+06	1.56193e+06	1.5435e+07	5.37986e+06	5.52097e+06	2.20581e+06	101507	4.93548e+06	95014.4	5.87607e+06
i.V. 72h	4.09772e+06	185832	30312.3	2.5212e+06	2.066e+06	2.76316e+06	23640.9	91589.1	8677.3	141795	71502.8	5.19939e+06	115246	837024	1.1919e+06	1.44905e+06	10774.3	314705	347582	335668	172096	2.13359e+06	1.64459e+06	392652	7.09818e+06	1.39265e+07	9.08371e+06	3.8078e+07	5.45507e+07	5.30018e+06	2.37314e+06	2.04953e+06	1.13735e+08	6.19285e+07	2.97339e+07	2.71885e+07	1.3668e+06	1.24133e+06	1.18458e+07	5.23721e+06	995608	8.7082e+06	3.25172e+06	4.52183e+06	1.66506e+06	112231	4.8535e+06	117746	5.96019e+06
i.V. 72h	4.61075e+06	96780	31344	3.46177e+06	2.11965e+06	3.2315e+06	31912.7	71875.4	9660.04	127979	96973.8	6.72251e+06	66929.5	980875	1.36127e+06	1.68218e+06	19034.6	451364	807661	1.06087e+06	445009	991037	169868	258546	1.61334e+06	1.17899e+06	759468	7.2709e+06	1.13592e+07	916533	923792	691998	6.03976e+07	3.71308e+07	1.32478e+07	1.33333e+07	1.02746e+06	886666	9.98039e+06	2.99264e+06	1.74002e+06	6.46991e+06	4.58569e+06	1.86519e+06	1.53922e+06	122060	5.38602e+06	120260	6.47724e+06
i.V. 72h	6.02878e+06	90225	41683.4	6.05684e+06	2.31051e+06	4.81904e+06	43751.1	88741.5	8803.69	176418	96528.2	1.17019e+07	88018.8	882920	1.80534e+06	1.61753e+06	15553.7	391550	322311	345189	187935	1.10046e+06	226802	232121	2.79537e+06	1.52239e+06	979476	8.31462e+06	1.34202e+07	951864	784224	620820	5.40602e+07	3.28536e+07	1.225e+07	1.0947e+07	807936	738134	6.82415e+06	3.08983e+06	812134	4.76332e+06	2.92452e+06	1.56797e+06	1.12724e+06	89479.9	4.29782e+06	93375.1	7.04264e+06
i.V. 72h	3.10562e+06	42115.9	26580.7	3.26805e+06	782396	1.39579e+06	29039.8	51042.3	3598.63	84098.7	40112.8	5.50299e+06	60471.4	577975	823647	1.34206e+06	12972.5	300649	167647	138268	87339.4	808565	136776	222839	1.12269e+06	642411	434172	2.88198e+06	4.84901e+06	418275	370993	285651	2.19243e+07	1.44009e+07	6.80293e+06	5.54263e+06	588279	471419	5.63873e+06	1.76401e+06	331865	3.32991e+06	1.22906e+06	814667	841301	94084.8	3.77623e+06	97425.8	5.44595e+06
i.V. 72h	3.4867e+06	71698.2	28668.8	2.96427e+06	1.03288e+06	1.45135e+06	29036.1	61389.1	6380.24	133166	57114.4	5.15802e+06	72953.7	524860	981701	1.50116e+06	17566	342497	219364	176182	128156	894914	197294	217759	1.97877e+06	1.60228e+06	1.0167e+06	8.01044e+06	1.19375e+07	749659	930092	743197	4.31475e+07	2.24607e+07	1.03789e+07	8.59703e+06	572260	664810	7.64074e+06	2.26415e+06	1.11807e+06	4.25489e+06	3.10793e+06	1.96455e+06	1.03207e+06	101297	4.27625e+06	96436.9	5.44119e+06
i.V. 72h	3.80953e+06	79798.3	26941.3	2.33558e+06	1.42816e+06	2.20019e+06	29438.2	93484.6	7644.51	151811	79931	5.41609e+06	82940.9	1.13111e+06	1.06226e+06	1.53807e+06	14642.7	285795	231701	184308	123471	840304	139030	228824	1.65836e+06	923014	601116	5.55931e+06	8.13255e+06	549859	780419	568133	3.33314e+07	1.89104e+07	9.59389e+06	6.4179e+06	564903	724801	9.15319e+06	2.34152e+06	777307	4.08235e+06	2.55265e+06	1.07716e+06	1.45176e+06	122261	5.52788e+06	135115	6.49148e+06
i.V. 168h	5.70142e+06	127874	42236	4.94089e+06	2.66759e+06	3.22155e+06	48417.2	74941	9935.43	157132	142772	6.51621e+06	58511.2	679914	1.28338e+06	1.73774e+06	32503.8	635860	522170	619946	353430	1.24912e+06	496601	285098	3.44429e+06	4.45397e+06	2.86185e+06	2.23174e+07	3.00768e+07	2.24686e+06	2.14727e+06	1.54225e+06	1.07495e+08	5.37545e+07	2.57645e+07	2.16264e+07	1.18393e+06	1.51035e+06	1.3143e+07	5.84845e+06	2.20617e+06	7.83937e+06	5.96111e+06	1.61488e+06	1.99603e+06	118560	5.21973e+06	137161	7.7629e+06
i.V. 168h	3.91291e+06	90368.9	34219.3	2.94702e+06	1.64986e+06	1.81309e+06	28398.7	65808.3	13270.8	155522	90522.5	5.28337e+06	68751.9	583465	1.01299e+06	1.61531e+06	13787.5	340892	396146	483504	248997	957057	158530	285351	1.89205e+06	1.75041e+06	1.01121e+06	1.13108e+07	1.57599e+07	769465	1.32522e+06	912611	6.13241e+07	2.81848e+07	1.38385e+07	1.09971e+07	625526	932380	6.6511e+06	4.69989e+06	1.34631e+06	5.20908e+06	3.62005e+06	1.76257e+06	1.57044e+06	124588	6.16509e+06	119927	7.84106e+06
i.V. 168h	2.70671e+06	242435	30544.6	1.86083e+06	2.26263e+06	1.35834e+06	18746.5	71221.8	16507.5	141059	93799.9	2.75594e+06	69896.3	322242	641123	1.40211e+06	9802	229293	280265	288133	123519	1.33919e+06	853617	324094	3.14034e+06	8.89006e+06	6.91288e+06	2.56381e+07	4.63124e+07	2.3288e+06	6.3237e+06	3.57875e+06	9.69418e+07	3.15622e+07	2.69348e+07	1.88278e+07	535078	1.49939e+06	5.59324e+06	3.32728e+06	1.36378e+06	3.28642e+06	3.09819e+06	2.46523e+06	1.26253e+06	159340	7.05103e+06	120789	7.43185e+06
i.V. 168h	4.19874e+06	251957	24865.9	3.12561e+06	1.85126e+06	1.08595e+06	32484.4	50474.5	11726.9	124442	92653.1	3.20974e+06	94108.3	358250	606399	1.51122e+06	8141.79	271228	252519	203084	121792	1.3506e+06	930257	327437	3.65727e+06	1.00162e+07	7.59442e+06	2.603e+07	4.74527e+07	1.41526e+06	3.97917e+06	1.81915e+06	7.70382e+07	2.3434e+07	1.61118e+07	9.63505e+06	461035	877769	2.93612e+06	4.96805e+06	1.19662e+06	2.47241e+06	1.68106e+06	2.5164e+06	1.02974e+06	130287	8.38873e+06	109251	9.27295e+06
i.V. 168h	3.11784e+06	187966	36753.1	2.49446e+06	1.60904e+06	1.05963e+06	22794.5	61765.9	13932.5	172855	111143	4.80163e+06	73736	536567	847213	1.41795e+06	10444.7	236772	209009	159469	111309	1.15569e+06	540932	267740	3.00833e+06	6.08566e+06	3.9425e+06	1.80733e+07	2.80979e+07	715385	2.84655e+06	1.42077e+06	5.09795e+07	1.48933e+07	1.34434e+07	8.25372e+06	418812	777950	3.99838e+06	3.17721e+06	898790	2.56174e+06	1.43894e+06	1.66186e+06	1.12804e+06	124016	6.76739e+06	107467	7.69282e+06
i.V. dd 72h	4.51789e+06	93960.2	31032.3	4.05245e+06	1.2538e+06	1.95506e+06	36842.2	64396	6149.74	109556	65085.9	4.98408e+06	73364	830961	870582	1.35633e+06	20916.3	482990	199689	151306	123863	1.22594e+06	364471	240881	3.19646e+06	3.62288e+06	2.25232e+06	1.49254e+07	2.40366e+07	1.65309e+06	1.31615e+06	1.11825e+06	7.0889e+07	4.08066e+07	1.39561e+07	1.35081e+07	931232	747204	1.55216e+07	3.84188e+06	1.8421e+06	9.01816e+06	5.89694e+06	2.2234e+06	1.89826e+06	115571	5.64892e+06	92357.7	6.3689e+06
i.V. dd 72h	4.06494e+06	114351	36779.4	2.96581e+06	1.38387e+06	2.10355e+06	28064.1	73893.5	6348.02	130104	67828.4	4.91841e+06	103736	607349	1.03448e+06	1.59896e+06	17297.4	462984	394175	356264	206174	1.06039e+06	285286	234608	2.11007e+06	2.71554e+06	1.93929e+06	1.10167e+07	1.97915e+07	1.98608e+06	1.79683e+06	1.63086e+06	7.21298e+07	4.17925e+07	1.42739e+07	1.40044e+07	1.05267e+06	819132	9.23669e+06	4.67813e+06	1.13721e+06	7.36719e+06	3.85825e+06	2.60125e+06	1.37492e+06	130149	5.55895e+06	141650	7.75168e+06
i.V. dd 72h	4.2181e+06	89417.7	30906.4	2.78188e+06	1.16411e+06	2.0135e+06	24169.7	57231.7	4626.44	92269.3	67276.7	6.17047e+06	94502.2	762853	803390	1.51823e+06	20557.7	614554	208068	123419	148483	1.32154e+06	326235	238336	3.67385e+06	3.41007e+06	2.19218e+06	1.45019e+07	2.45662e+07	1.60587e+06	1.25273e+06	1.06539e+06	7.34924e+07	4.78816e+07	1.15369e+07	1.14291e+07	1.04689e+06	547299	1.31255e+07	6.10742e+06	1.47732e+06	9.56896e+06	5.13652e+06	2.18022e+06	1.52114e+06	123366	6.0183e+06	121151	7.4482e+06
i.P. 72h	2.4721e+06	30653.5	26962.5	2.94311e+06	530717	912601	28541.8	26265.8	2518.38	55066.4	26500.2	5.74231e+06	39401.1	365641	802414	1.75421e+06	21690.3	517445	184844	121997	110815	873059	166323	243412	1.5318e+06	844353	527658	4.13749e+06	6.02067e+06	323065	385680	211765	2.1123e+07	1.23991e+07	6.73605e+06	4.50147e+06	476422	403160	4.1346e+06	3.23994e+06	463204	2.57357e+06	1.60197e+06	789725	670940	119431	4.50135e+06	142620	8.66502e+06
i.P. 72h	3.53177e+06	68323.6	28147.3	2.9179e+06	1.07792e+06	1.97161e+06	21697.9	39982.5	4481.52	75302.2	71123.7	6.20886e+06	73846.2	583600	1.18352e+06	1.65971e+06	27602.6	604703	342405	308846	191321	1.05603e+06	340042	234533	2.31001e+06	2.53134e+06	1.50582e+06	1.06549e+07	1.7244e+07	1.15658e+06	815604	623677	5.70825e+07	3.65152e+07	1.1404e+07	1.14127e+07	980607	616856	8.6423e+06	3.87574e+06	1.32391e+06	7.11812e+06	4.75996e+06	2.29138e+06	1.12876e+06	109283	5.11871e+06	123395	8.36934e+06
i.P. 72h	3.33717e+06	65259.6	23641.5	2.939e+06	1.07481e+06	2.0018e+06	27650.9	39388.6	3612.63	74617	63602.5	6.23785e+06	79456.9	600735	1.04337e+06	1.54545e+06	19496.2	577075	245026	205588	129504	922194	193069	235869	1.74513e+06	1.37472e+06	823662	7.62176e+06	1.3256e+07	842290	584501	439560	5.08099e+07	3.31088e+07	1.02478e+07	1.04861e+07	918644	567173	7.98166e+06	4.07997e+06	844707	7.34299e+06	3.36079e+06	1.9499e+06	1.11907e+06	104184	4.90231e+06	128470	8.09926e+06
i.P. 72h	2.86463e+06	48007.1	23358.7	2.88404e+06	809856	1.2602e+06	26411.7	34085.9	4165.54	65244.2	47888.1	4.368e+06	52958.2	417773	773848	1.57226e+06	19571.8	689449	345201	356327	204113	928209	188046	224119	2.40363e+06	1.55953e+06	941891	9.10416e+06	1.49342e+07	1.05999e+06	747447	627431	6.41774e+07	4.16829e+07	1.14276e+07	1.18221e+07	979536	657717	9.59118e+06	5.10399e+06	1.08763e+06	7.79222e+06	4.31346e+06	3.54436e+06	1.48911e+06	105378	4.38049e+06	133395	8.21352e+06
i.P. 72h	4.9341e+06	455565	30930.2	2.41874e+06	6.06563e+06	3.50203e+06	23934.8	115966	22834.2	253640	182104	5.72174e+06	178613	1.17074e+06	1.80658e+06	1.37054e+06	16487.5	349258	394298	434814	171801	1.25731e+06	629207	305660	2.81239e+06	7.56386e+06	6.04991e+06	2.42849e+07	4.50341e+07	2.84488e+06	4.90844e+06	2.6935e+06	1.10527e+08	3.63292e+07	3.17232e+07	2.30559e+07	595271	1.6987e+06	5.195e+06	6.46698e+06	1.37979e+06	4.8632e+06	2.36087e+06	4.19159e+06	1.64628e+06	139742	6.36086e+06	107189	6.18418e+06
i.P. 72h	3.82584e+06	71972.8	19860.6	3.0992e+06	1.09864e+06	1.54124e+06	25721.3	30664.4	4584.4	55034.1	77261.6	3.29189e+06	58433	438256	685430	1.3475e+06	23984.4	706088	293323	274102	166481	927108	221248	253680	2.32794e+06	2.44491e+06	1.54113e+06	1.58475e+07	2.80178e+07	2.08461e+06	1.42654e+06	1.28267e+06	1.25284e+08	8.12688e+07	1.66544e+07	1.82227e+07	1.68489e+06	772912	1.72003e+07	6.69084e+06	2.46567e+06	1.27976e+07	8.24482e+06	5.39946e+06	1.74569e+06	75176.4	2.94159e+06	106837	5.73307e+06
[truncated: 233 more columns]
